# Supplementary material for: Treatment Itinerary and Health System Delay Among Patients With Pulmonary Tuberculosis in Ile-ife, South-western Nigeria
Source: Research Square preprint supplement (doi:10.21203/rs.3.rs-7934694/v1), 2025-12-08
Supplement: Supplementary file 1 [file 7bb8d2dc1fcaaf575c0d545c.docx]

# **TREATMENT ITINERARY AND HEALTH SYSTEM DELAY AMONG PATIENTS WITH PULMONARY TUBERCULOSIS IN ILE-IFE, SOUTH-WESTERN NIGERIA**

**PATIENT’S QUESTIONNAIRE**

Good day Sir/Ma, this research work is aimed at determining the treatment itinerary and delay in diagnosis caused by the health system among patients with pulmonary tuberculosis in Ile-Ife to improve access to early diagnosis and treatment of the disease. Please read and answer the following questions truthfully. Your answers will be kept strictly confidential. Thanks for your cooperation.

| Serial No………………………………. |  |
| --- | --- |

SECTION A- SOCIO-DEMOGRAPHIC SECTION

| S/N | Questions and Options (Interviewer should circle the appropriate option. Interviewer should not write in the shaded portion) |  |  |
| --- | --- | --- | --- |
| Q S/N | Code |
| 1 | Age (as at last birthday) | Q1 |  |
| 2 | Gender  1=Male 2=Female | Q2 |  |
| 3 | Religion  1 = Islam 2= Christianity 3= Traditional 4=Others (specify} | Q3 |  |
| 4 | Marital status  1 = Single (Never married) 2= Married 3= Separated or Divorced 4= Widowed 5=Others (specify) | Q4 |  |
| 5 | If married, type of marriage  1=Monogamous 2= Polygamous | Q5 |  |
| 6 | What is your tribe?  1= Yoruba 2 = Hausa 3= Igbo 4=Others (specify) | Q6 |  |
| 7 | Previous Occupation | Q7 |  |
| 8 | Current Occupation (If any) …………………………… | Q8 |  |
| 9 | Level of Education (Completed)  0= None 1= Primary 2= Secondary 3= Tertiary 4= Postgraduate | Q9 |  |

SECTION B – ASSESSMENT OF DIAGNOSTIC AND TREATMENT DELAYS

1. History of current illness

| S/N |  | Presenting symptoms | Date of onset (dd/mm/yy) | Q s/no | Code |
| --- | --- | --- | --- | --- | --- |
|  | A | Cough 1= yes 0= no |  | Q1a |  |
| B | Fever 1= yes 0= no |  | Q1b |  |
| C | Loss of Weight 1= yes 0= no |  | Q1c |  |
| D | Haemoptysis 1= yes 0= no |  | Q1d |  |
| E | Chest pain 1= yes 0= no |  | Q1e |  |
| F | Others (specify)------------------------------- |  | Q1f |  |
| 2 |  | Which symptom(s) made you seek healthcare? .................................. |  | Q2 |  |

1. Accessibility to the Public Health Facility Providing Treatment
   1. Time to reach from home to the nearest public health facility:
   1. <1/2 hr.; 2. ½-1 hr.; 3. > 1hr
   2. Distance (in Km) from home to the nearest health facility providing treatment: ……….
2. Health seeking behaviour with onset of symptoms

| S/N |  | Q s/no | Code |
| --- | --- | --- | --- |
| 1 | What was your first action, when you decided to seek care for your cough?  0= Health Care Provider 1= Self-medication 2= Traditional medicine 3= PHC worker at home 4= Drug stores (pharmacies) 5= Others………….. | Q1 |  |
| 2 | Date first seen by a Formal-Health Care Provider (FHCP) for this current illness ……………………………. | Q2 |  |
| 3 | What was the health facility of the FHCP whom you first sought his consultation?  0= TB Centre 1= PHC 2= Chest Clinic/Hospital 3= Public Hospital/ General outpatient clinic 4= Private Practice (Hospital or Clinic 5= Others (specify) ………….. | Q3 |  |
| 4 | If private practice in Q3 above, what is the specialty of the HCP whom you sought his consultation?  1= Chest specialist 2= Internist 3= General Practitioner 4= Others (specify) ………….. | Q4 |  |
| 5 | What was the health facility of the second FHCP whom you sought his consultation?  0= TB Centre 1= PHC 2= Chest Clinic/Hospital 3= Public Hospital/ General outpatient clinic 4= Private Practice (Hospital or Clinic 5= Others (specify) ………….. |  |  |
| 6 | If private practice in Q5 above, what is the specialty of the HCP whom you sought his consultation?  1= Chest specialist 2= Internist 3= General Practitioner 4= Others (specify) ………….. |  |  |
| 7 | What was the health facility of the third FHCP whom you sought his consultation?  0= TB Centre 1= PHC 2= Chest Clinic/Hospital 3= Public Hospital/ General outpatient clinic 4= Private Practice (Hospital or Clinic 5= Others (specify) ………….. |  |  |
| 8 | If private practice in Q7 above, what is the specialty of the HCP whom you sought his consultation?  1= Chest specialist 2= Internist 3= General Practitioner 4= Others (specify) ………….. |  |  |
| 9 | Reasons of first consultation of the health facility (mentioned in Q3) with the onset of symptoms  0= Accessible 1= Confidence in getting cured 2= Services available anytime 3= Referred by previous health service 4= Free services 5= Advised by somebody 6= Others (specify) ………….. |  |  |
| 10 | What were your reasons of non-consultation of health facility (coded 0,1,2 in Q3) with the onset of symptoms (in case he/she did not consult 0,1,2)  0= Too far 1= Too busy/long waiting time 2= Bad experience 3= Others (specify)…………………. |  |  |

IV. Information from patient’s record

1. Date of first TB diagnosis (dd/mm/yy): …………………………….
2. Number of health seeking encounters (HCP) before initial TB diagnosis:
3. Health facility of the HCP who made the initial TB diagnosis

[0]= TB Centre [1]= PHC [2]= Chest Clinic/Hospital [3]= Public Hospital/ General outpatient clinic [4]= Private Practice (Hospital or Clinic [5]= Others (specify) …………………..
4. Specialty of the HCP who made the initial TB diagnosis: (underline one)
 [i]. Chest specialist [ii]. Internist [iii]. General Practitioner [iv] Community Health Officer/Community Health Extension Worker [v]. Others (specify)…………

5. Action taken by HCP who made the initial TB diagnosis (Check iv and only one of i-iii):

| S/No | Action | Date [dd/mm/yy] | Result (Underline only one) |
| --- | --- | --- | --- |
| i. | Sputum examination |  |  |
| ii. | X-ray |  | (i). Not suggestive  (ii). Suggestive |
| iii. | Both Sputum examination and X-ray |  | X-ray:  (i). Not suggestive  (ii). Suggestive Sputum:  (i). Negative  (ii). Positive |
| iv. | HIV screening |  | (i). Negative  (ii). Positive |

6. Date of initiation of treatment (dd/mm/yy): ………………………

V. SUMMARY OF DELAY BASED ON THE CONCEPTUAL FRAMEWORK

| S/No | Type of delay | Key | Time (days) |
| --- | --- | --- | --- |
| 1. | Patient Delay | Q2 of sub-section F – Q1a of sub-section C |  |
| 2. | Doctor Delay | Q1 of sub-section I - Q2 of sub-section F |  |
| 3. | Diagnostic Delay | Q1 of sub-section I – Q1a of sub-section C |  |
| 4. | Treatment Delay | Q7 of sub-section I – Q1 of sub-section I |  |
| 5. | Health System Delay | Q7 of sub-section 1 - Q2 of sub-section F |  |
| 6. | Total Delay | Q7 of sub-section I – Q1a of sub-section C |  |
