# Supplementary material for: Treatment Itinerary and Health System Delay Among Patients With Pulmonary Tuberculosis in Ile-ife, South-western Nigeria
Source: Research Square preprint supplement (doi:10.21203/rs.3.rs-7934694/v1), 2025-12-08
Supplement: Supplementary file 2 [file 8b724f46bef80cf7fcdb9d85.docx]

STROBE Statement—checklist of items that should be included in reports of observational studies

|  | Item No. | Recommendation | Page  No. | Relevant text from manuscript |
| --- | --- | --- | --- | --- |
| **Title and abstract** | 1 | (*a*) Indicate the study’s design with a commonly used term in the title or the abstract | 4 | A descriptive cross-sectional study….. |
| (*b*) Provide in the abstract an informative and balanced summary of what was done and what was found | 4 | **Methods:** This descriptive cross-sectional study involved patients with pulmonary tuberculosis in the Directly Observed Treatment Short Course (DOTS) centres in Ile-Ife. A multistage sampling technique was used to recruit 320 patients, and an interviewer-administered questionnaire was used to obtain data. Descriptive and inferential analyses were done, and a p-value ˂ 0.05 was considered statistically significant  **Results:** Only 10.3% of patients sought formal healthcare as their initial action, with 75.6% of them waiting 21 days or more from the onset of symptoms before their first formal health-seeking. The majority of patients (83.1%) visited one or two formal health-care providers for the diagnosis. The median HSD was 13.5 days (Range 0 – 105). The factors that were independently related to prolonged HSD were monthly family income (Odds Ratio [OR] 1.73; 95% Confidence Interval [CI] 1.02 – 2.94; p = 0.04), number of health-seeking encounters before TB diagnosis (OR, 0.23; 95% CI, 0.08 – 0.68; p < 0.01), and the first health facility visited (OR, 0.25; 95% CI, 0.14 – 0.44; p < 0.01). |
| Introduction | | | |  |
| Background/rationale | 2 | Explain the scientific background and rationale for the investigation being reported | 7 | While some studies have examined delays in TB diagnosis and treatment in Nigeria, research specifically on the exploration of the patients' "treatment itinerary"— from the onset of symptoms to the initiation of treatment — and its association with HSD is less common. Examining the particular treatment itinerary and obstacles to prompt TB diagnosis in this setting is crucial given the distinct sociocultural and healthcare dynamics of Ile-Ife. The development of contextually relevant interventions targeted at minimising HSD will be guided by these insights. Additionally, knowing how patients seek medical attention and the difficulties in the healthcare system will help to improve community awareness, strengthen TB control initiatives, and eventually lower the region's TB burden. It will also assist policymakers and program managers in identifying service delivery gaps and more efficiently allocating resources in order to enhance early case detection, prompt treatment initiation, and overall program performance. |
| Objectives | 3 | State specific objectives, including any prespecified hypotheses | 8 | The specific objectives were to describe the treatment-seeking itinerary of patients with pulmonary tuberculosis before the diagnosis was confirmed, to determine the duration of HSD among patients with pulmonary tuberculosis, and to identify the determinants of prolonged HSD. |
| Methods | | | |  |
| Study design | 4 | Present key elements of study design early in the paper | 8 | We used a descriptive cross-sectional design to study the patients in the DOTS centres in Ile-Ife, an ancient city located in Osun State, southwestern Nigeria. |
| Setting | 5 | Describe the setting, locations, and relevant dates, including periods of recruitment, exposure, follow-up, and data collection | 8-9 | **Study design and study site**  It has four Local Government Areas (LGAs): Ife Central LGA, Ife East LGA, Ife South LGA, and Ife North LGA, with a total population of 835,600, according to the 2022 extrapolation of the 2006 National Population Census.23 Osun State uses the passive case-finding strategy, which only identifies TB patients who present with symptoms at healthcare facilities.24  Tuberculosis diagnosis in the DOTS facilities is by one of the sputum Genexpert, chest radiograph, or both.  **Study population**  Patients receiving treatment for pulmonary tuberculosis at the DOTS centres in Ile-Ife, Osun State and who were at least 18 years old, constituted the study population. **Sample size and sampling technique**  This study was conducted in 10 DOT centres that were selected by a multistage sampling approach from the four LGAs in Ile-Ife. 320 respondents were recruited consecutively. The study was conducted between 20/5/2021 and 20/8/2021. |
| Participants | 6 | (*a*) *Cross-sectional study*—Give the eligibility criteria, and the sources and methods of selection of participants | 9 | **Selection Criteria:** The study included consenting adult patients at least 18 years old in both the initiation and continuation stages of treatment. Exclusion criteria included patients with extrapulmonary TB, those who had received prior TB treatment, and patients who were extremely sick and might not be able to give accurate information. |
| (*b*) |  |  |
| Variables | 7 | Clearly define all outcomes, exposures, predictors, potential confounders, and effect modifiers. Give diagnostic criteria, if applicable | 11-12 | Health system delay was the dependent variable. Patients’ sociodemographic characteristics, health system factors, and treatment itinerary factors **(**number of health-seeking encounters before TB diagnosis, first health facility visited, first action taken when seeking care, health facility where TB diagnosis was made, cadre of healthcare provider who diagnosed TB, distance to the nearest TB treatment centre, time to reach the nearest TB treatment centre) were the independent variables. Seven days was used as a cut-off value for prolonged HSD. Participants were classified as having "no prolonged HSD" if their HSD was not more than seven days, and as having "prolonged HSD" if their HSD was greater than seven days. |
| Data sources/ measurement | 8* | For each variable of interest, give sources of data and details of methods of assessment (measurement). Describe comparability of assessment methods if there is more than one group | 11 | A pre-tested interviewer-administered questionnaire was used to collect data on socio-demographic characteristics, HSD, and the respondent’s treatment itinerary. Treatment itinerary, health system delay, and its determinants were assessed with a WHO-validated questionnaire on case-finding in tuberculosis patients. |
| Bias | 9 | Describe any efforts to address potential sources of bias | 10 | In order to ensure consistency, all members of the research team underwent a week-long training on data collection procedures using simulated patients. A Cohen's weighted kappa score analysis was performed on the results to ascertain the variability within and between members of the research team. The research team's intra- and inter-observer Cohen's weighted kappa scores were higher than 0.95. Recall bias regarding key events from which the length of delays was calculated was lessened by using probing methods to help the patients recall the significant events. |
| Study size | 10 | Explain how the study size was arrived at | 9 | The minimum sample size was determined using the following formula for a single proportion:………………25  Where z is the standard deviation of 1.96, which corresponds to a 95% confidence interval.  p = 0.253 (published local prevalence of prolonged HSD among TB patients, 25.3%)4  q = 1-p= 0.747  d = 0.05 at a precision level of 5%  n = the minimum sample size giving 290.4. To adjust for non-response, 10% of the calculated sample size was added to give a minimum sample size of 320. |

Continued on next page

| Quantitative variables | 11 | Explain how quantitative variables were handled in the analyses. If applicable, describe which groupings were chosen and why | 12 | We first used the Kolmogorov-Smirnov test to assess the distribution of the continuous data. For each variable, descriptive statistics were computed. Categorical variables were represented as proportions and percentages. Continuous variables were represented as means and standard deviations if they were normally distributed. Data that were not normally distributed, such as the duration of the delay, were presented as median and interquartile range. Seven days was used as a cut-off value for prolonged HSD. Participants were classified as having "no prolonged HSD" if their HSD was not more than seven days, and as having "prolonged HSD" if their HSD was greater than seven days. |
| --- | --- | --- | --- | --- |
| Statistical methods | 12 | (*a*) Describe all statistical methods, including those used to control for confounding | 12 | In order to evaluate the factors associated with HSD, a bivariate analysis was performed using the Chi-square test to look at the relationship between the dependent variable and the independent variables. Independent variables that were substantially linked to the HSD on bivariate analysis were examined using multiple logistic regressions. P-values of less than 0.05 were deemed statistically significant. |
| (*b*) Describe any methods used to examine subgroups and interactions |  | Not applicable |
| (*c*) Explain how missing data were addressed |  | There were no missing data because the questionnaire was interviewer-administered. |
| (*d*) *Cross-sectional study*—If applicable, describe analytical methods taking account of sampling strategy |  | Not applicable |
| (*e*) Describe any sensitivity analyses |  | Not applicable |
| Results | | | | |
| Participants | 13* | (a) Report numbers of individuals at each stage of study—eg numbers potentially eligible, examined for eligibility, confirmed eligible, included in the study, completing follow-up, and analysed | 12 | Of the remaining 321 eligible patients, 320 were selected to participate in the study as respondents. Specifically, 133 were diagnosed during the study period, and 187 were undergoing treatment before the commencement of the study. |
| (b) Give reasons for non-participation at each stage | 12 | Eleven of the 332 patients who underwent eligibility screening were excluded from the study because seven of them were being retreated, and four were admitted for severe illness. |
| (c) Consider use of a flow diagram |  | Fig 1 |
| Descriptive data | 14* | (a) Give characteristics of study participants (eg demographic, clinical, social) and information on exposures and potential confounders | 13 | Table 1 |
| (b) Indicate number of participants with missing data for each variable of interest |  | None |
| Outcome data | 15* | *Cross-sectional study—*Report numbers of outcome events or summary measures | 17-18 | There was a median doctor delay of 11 days (range 0–94) between the patients’ initial visit to a formal healthcare provider and the diagnosis of tuberculosis, as seen in Table 3. After the diagnosis of tuberculosis, the median treatment delay before the start of treatment was 2 days (range 0–81). Overall, the median HSD between the first visit to a formal healthcare provider and the start of tuberculosis treatment was 13.5 days (Range 0–105) among the patients. As high as 69% of the patients experienced a prolonged HSD, using seven days as the cut-off (Figure 4). |
| Main results | 16 | (*a*) Give unadjusted estimates and, if applicable, confounder-adjusted estimates and their precision (eg, 95% confidence interval). Make clear which confounders were adjusted for and why they were included | 23 | Table 6 |
| (*b*) Report category boundaries when continuous variables were categorized | 23 | Table 6 |
| (*c*) If relevant, consider translating estimates of relative risk into absolute risk for a meaningful time period | Not applicable |  |

Continued on next page

| Other analyses | 17 | Report other analyses done—eg analyses of subgroups and interactions, and sensitivity analyses |  |  |
| --- | --- | --- | --- | --- |
| Discussion | | | | |
| Key results | 18 | Summarise key results with reference to study objectives | 24 | This study investigated the treatment itinerary and factors contributing to HSD among patients with pulmonary tuberculosis in Ile-Ife, Southwestern Nigeria. The study findings indicate that only 10.3% of patients sought formal healthcare as their first action. A large majority (75.6%) delayed seeking formal care for ≥21 days after symptom onset, and 83.1% of respondents visited one or two formal healthcare providers before diagnosis. The median HSD was 13.5 days, with 69% of patients experiencing a prolonged HSD (greater than 7 days). Having a monthly family income < ₦70,000, residing in rural areas, having >2 health-seeking encounters before diagnosis, visiting private health facilities, and having to travel more than 10 km to a TB treatment centre were the determinants of prolonged health system delay. |
| Limitations | 19 | Discuss limitations of the study, taking into account sources of potential bias or imprecision. Discuss both direction and magnitude of any potential bias | 29 | The study used a descriptive cross-sectional design. This makes it challenging to establish a clear causal link between the identified factors and prolonged health system delay. Secondly, an interviewer-administered questionnaire was used to gather data, asking patients to recall timelines and events that might have happened weeks or months earlier and which they might not recall precisely. Recall bias could result from this, altering the reported length of delays. However, this was lessened by using other probing methods to help the patients recall locally significant events and some data was extracted from their treatment cards. Moreover, potential social desirability bias may have influenced self-reported treatment-seeking behaviours. |
| Interpretation | 20 | Give a cautious overall interpretation of results considering objectives, limitations, multiplicity of analyses, results from similar studies, and other relevant evidence |  | Page 25-28 |
| Generalisability | 21 | Discuss the generalisability (external validity) of the study results | 24 | One of the strengths of this study is the large sample size. Also, the multi-stage sampling approach used for sample recruitment renders the study findings generalizable to the study environment, and potentially makes it possible to extrapolate the findings to other environments with similar population profiles. We were, however, cautious about the extrapolation of findings to other cultures due to the known influences of culture on treatment-seeking behaviour. The study was conducted in a setting that was predominantly Yoruba, an ethnic group known to have a very strong cultural orientation, which influences the treatment-seeking pathway. |
| Other information | |  | | |
| Funding | 22 | Give the source of funding and the role of the funders for the present study and, if applicable, for the original study on which the present article is based | 31 | The study was funded by the researchers. No grant was given to the authors by any public, private, or nonprofit funding organisation. |

*Give information separately for cases and controls in case-control studies and, if applicable, for exposed and unexposed groups in cohort and cross-sectional studies.

**Note:** An Explanation and Elaboration article discusses each checklist item and gives methodological background and published examples of transparent reporting. The STROBE checklist is best used in conjunction with this article (freely available on the Web sites of PLoS Medicine at http://www.plosmedicine.org/, Annals of Internal Medicine at http://www.annals.org/, and Epidemiology at http://www.epidem.com/). Information on the STROBE Initiative is available at www.strobe-statement.org.
