# Supplementary material for: Treatment Itinerary and Health System Delay Among Patients With Pulmonary Tuberculosis in Ile-ife, South-western Nigeria
Source: Research Square preprint supplement (doi:10.21203/rs.3.rs-7934694/v1), 2025-12-08
Supplement: Supplementary file 3 [file 98caed0fcdcb8da67400f172.docx]

# **TREATMENT ITINERARY AND HEALTH SYSTEM DELAY AMONG PATIENTS WITH PULMONARY TUBERCULOSIS IN ILE-IFE, SOUTH-WESTERN NIGERIA**

**CONSENT FORM**

I have been invited to participate in a study to assess the treatment itinerary and delay in diagnosis caused by the health system among patients with pulmonary tuberculosis in Ile-Ife. I have read the information provided in the Subject Information Sheet, or it has been read to me.

I have had the opportunity to ask questions about the research, and all my questions have been answered satisfactorily. I consent voluntarily to participate in this study and understand that it involves answering some questions and undergoing a physical examination. I know I have the right to withdraw from the study at any time.

.................................................... ............................

Signature/thumbprint of participant Date

................................................... ...........................

Signature of interviewer: Date
