# Supplementary material for: Treatment Itinerary and Health System Delay Among Patients With Pulmonary Tuberculosis in Ile-ife, South-western Nigeria
Source: Research Square preprint supplement (doi:10.21203/rs.3.rs-7934694/v1), 2025-12-08
Supplement: Supplementary file 4 [file c9cc5f93bb9645559e879b02.docx]

# **TREATMENT ITINERARY AND HEALTH SYSTEM DELAY AMONG PATIENTS WITH PULMONARY TUBERCULOSIS IN ILE-IFE, SOUTH-WESTERN NIGERIA**

**SUBJECT INFORMATION SHEET**

Principal Investigator: Dr Ahmed Ayanleye Abdulakeem. Telephone No: 07039879808

E-mail: ahmediganna@gmail.com

Some general things to know about the study: Although tuberculosis is medically treatable, it has been difficult to eradicate because some people still face a considerable challenge in assessing quality care. I am going to give you information and invite you to participate in this study. Before you decide whether to participate, you can talk to anyone you feel comfortable with. There may be some words that you do not understand. Please ask me to stop as we go through the information, and I will take the time to explain.

The purpose of this study: The purpose of this study is to know the various treatment efforts of people who have tuberculosis, the challenges experienced before they could receive quality care and to also determine how delayed was the treatment.

Procedures: I will be asking you some questions about yourself and your effort at seeking care for your cough so far.

Benefits: The knowledge that I obtain from this study will be shared with you before it is published in a scientific journal.

Costs of Participation: Your participation in the study is voluntary and there is no cost attached.

Risks: You will not be exposed to any risks during this study.

Compensation: You will not be compensated for participating in this study.

Confidentiality: All the information obtained from you in this study will be kept with the utmost confidentiality.

Participants’ Rights: You have the right to participate or withdraw from this study at any time with no penalty.

Conflict of Interest: There is no conflict of interest.

For the Records: You will be given a copy of this document and the principal investigator can be reached on the documented phone number for any additional information.
